# Supplementary material for: A V–Ni-based nitride heterostructure as a highly efficient electrode for flexible all-solid-state supercapacitors
Source: Royal Society of Chemistry journal article supplement (doi:10.1039/d3nj02862c), 2023-01-01
Supplement: d3nj02862c1.pdf [file d3nj02862c1.pdf]

## V-Ni-based nitride heterostructure as a highly efficient electrode for flexible all-solid-state supercapacitors

Yue Feng<sup>1</sup>, Yu Chen<sup>1</sup>, Lan Yang<sup>1</sup>, Ningna Chen<sup>1</sup>, Ruiqing Liu<sup>1</sup>, Xiuqing Lin<sup>\*1</sup>, Wencai Wang<sup>2</sup> and Xiaomiao Feng<sup>\*1</sup>

1.Key Laboratory for Organic Electronics and Information Displays & Institute of Advanced Materials (IAM), Jiangsu National Synergetic Innovation Center for Advanced Materials (SICAM), School of Materials Science & Engineering, Nanjing University of Posts and Telecommunications, 9 Wenyuan Road, Nanjing 210023, China.

2.Beijing Building Materials Academy of Sciences Research, NO.69 North Road Jinding Street of Shijingshan District, Beijing 10004, China

\* Correspondence: [iamxjlin@njupt.edu.cn](mailto:iamxjlin@njupt.edu.cn); [iamxmfeng@njupt.edu.cn](mailto:iamxmfeng@njupt.edu.cn)

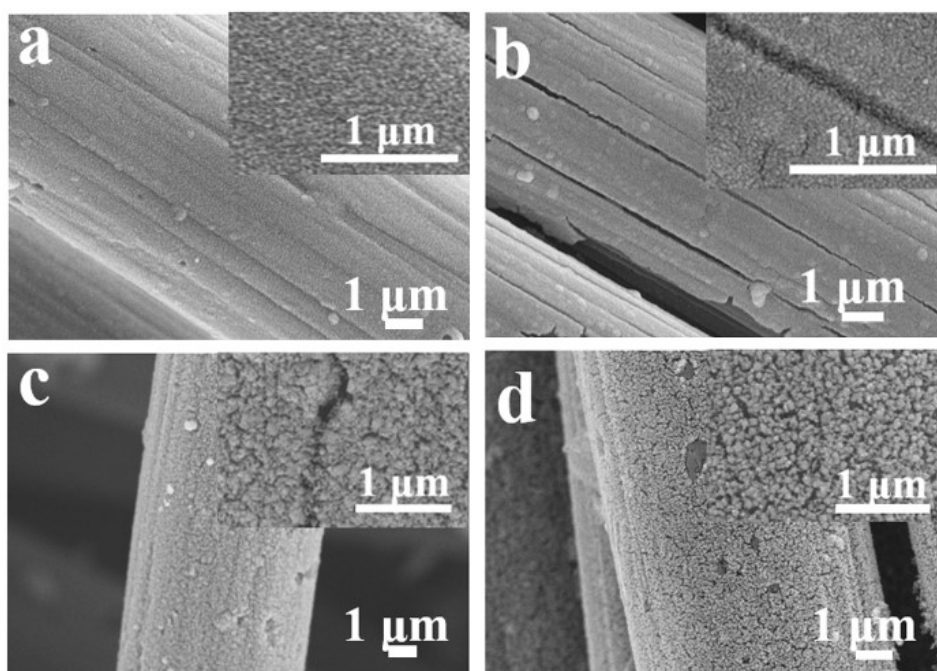

**Figure S1.** SEM images of VN/Ni<sub>3</sub>N-Ni/CC at different nitriding temperature of (a) 400 °C, (b) 500 °C, (c) 600 °C and (d) 700 °C.

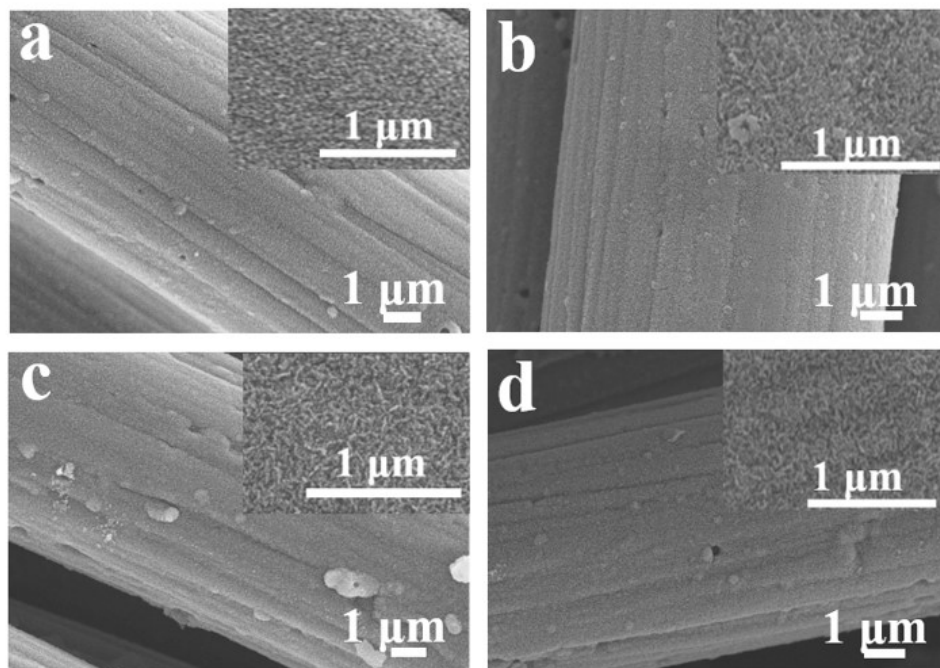

**Figure S2.** SEM images of VN/Ni<sub>3</sub>N-Ni/CC for different nitriding time of (a) 2 h, (b) 3 h, (c) 4 h and (d) 5 h at 400°C.

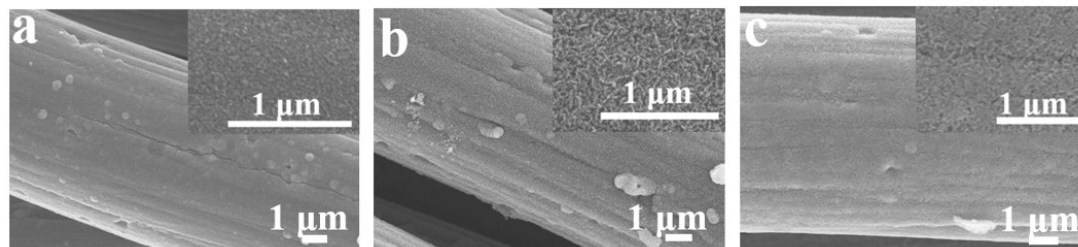

**Figure S3.** SEM images of VN/Ni<sub>3</sub>N-Ni/CC at different metal molar atomic ratios of (a) Ni:V=1:2, (b) Ni:V=1:1, (c) Ni:V=2:1.

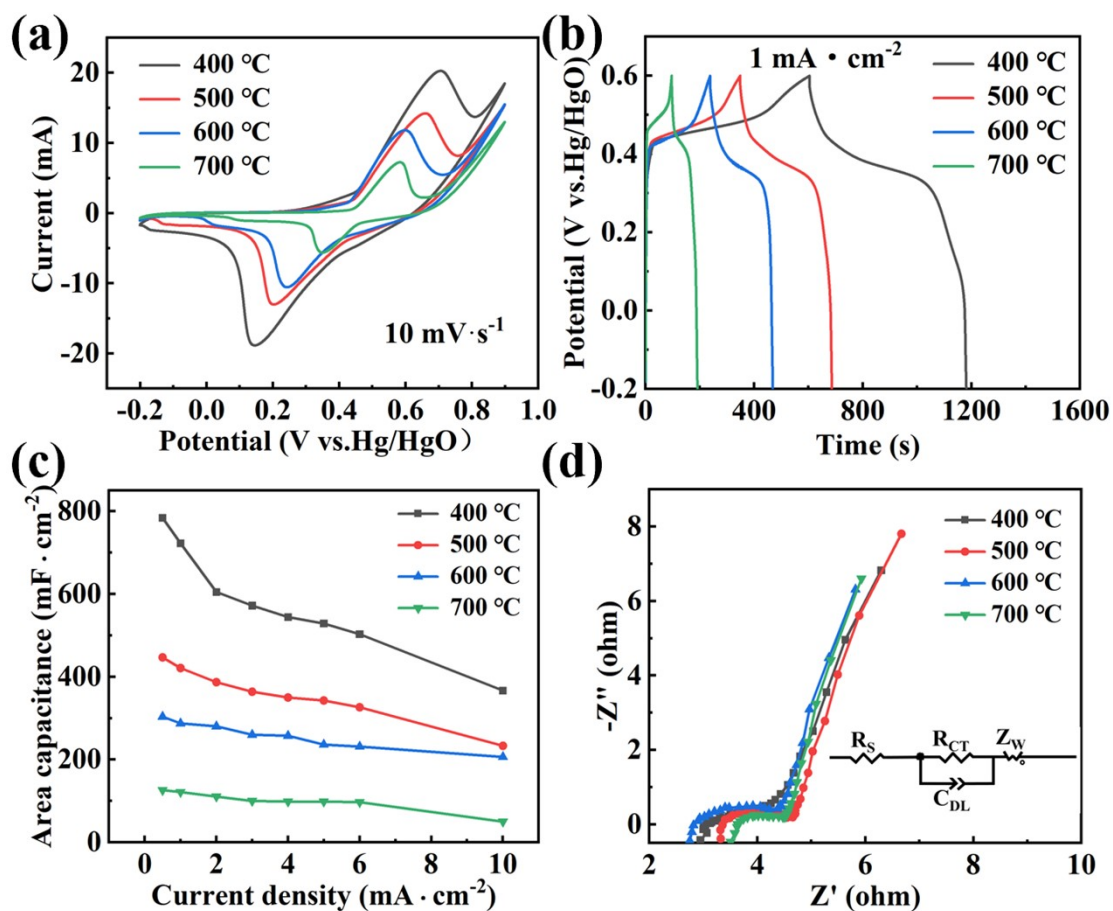

**Figure S4.** The comparison of electrochemical performances of the obtained VN/Ni<sub>3</sub>N-Ni/CC at different nitriding temperatures: (a) CV, (b) GCD, (c) area capacitance and (d) EIS curves.

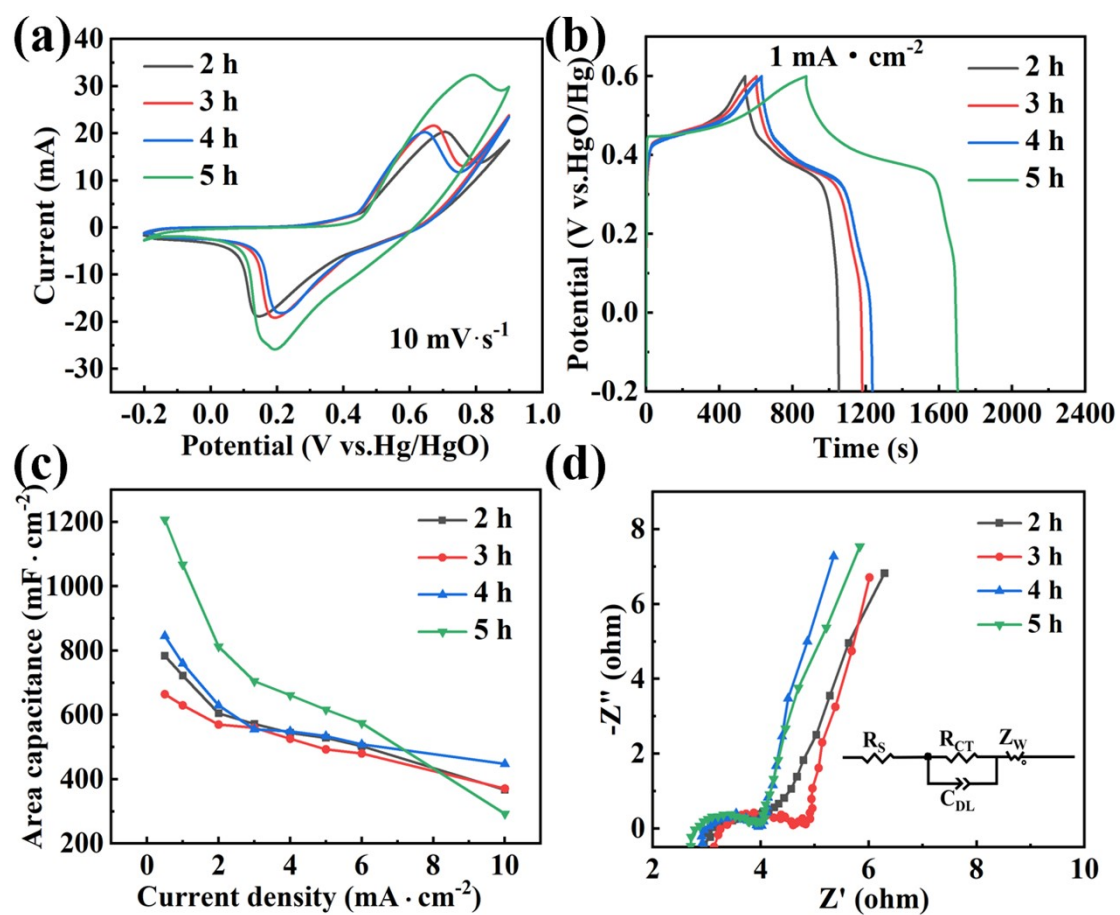

**Figure S5.** The comparison of electrochemical performances of the obtained VN/Ni<sub>3</sub>N-Ni/CC at different nitriding time: (a) CV, (b) GCD, (c) area capacitance and (d) EIS curves.

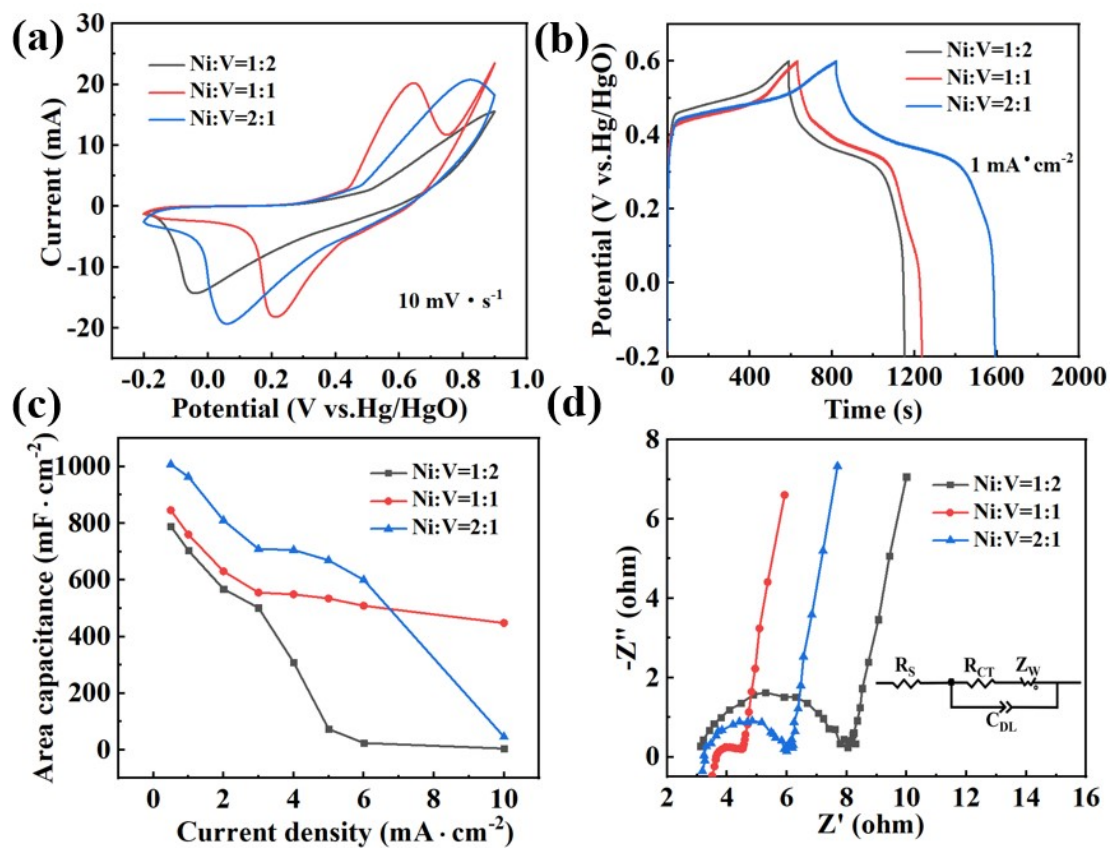

**Figure S6.** The comparison of electrochemical performances of the obtained VN/Ni<sub>3</sub>N-Ni/CC at different atomic ratios of Ni:V=1:2, Ni:V=1:1, Ni:V=2:1: (a) CV, (b) GCD, (c) area capacitance and (d) EIS curves.
